# Supplementary material
Source: publisher figshare collection journal article supplement (https://aacr.figshare.com/articles/dataset/_/22541260)
Supplement: Supplementary file 1 [file 40004632]

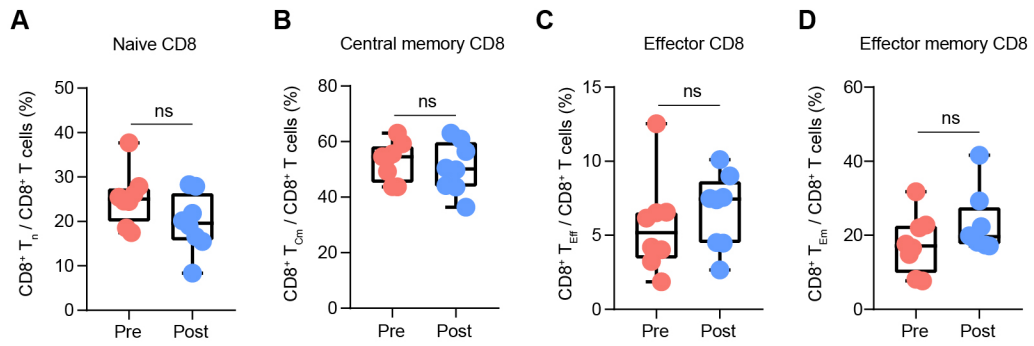

**Figure S1. The effects of IFN- $\alpha$  in combination with an anti-PD-1 antibody on HCC patients' peripheral subpopulations of CD8<sup>+</sup> T cells.**

**(A-D)** Percentages of subpopulations of CD8<sup>+</sup> T cells in the peripheral blood collected from pretreatment versus that collected from post-treatment of PD-1 blockade and IFN- $\alpha$  (n=8). All data presented are shown as the mean  $\pm$  SD.

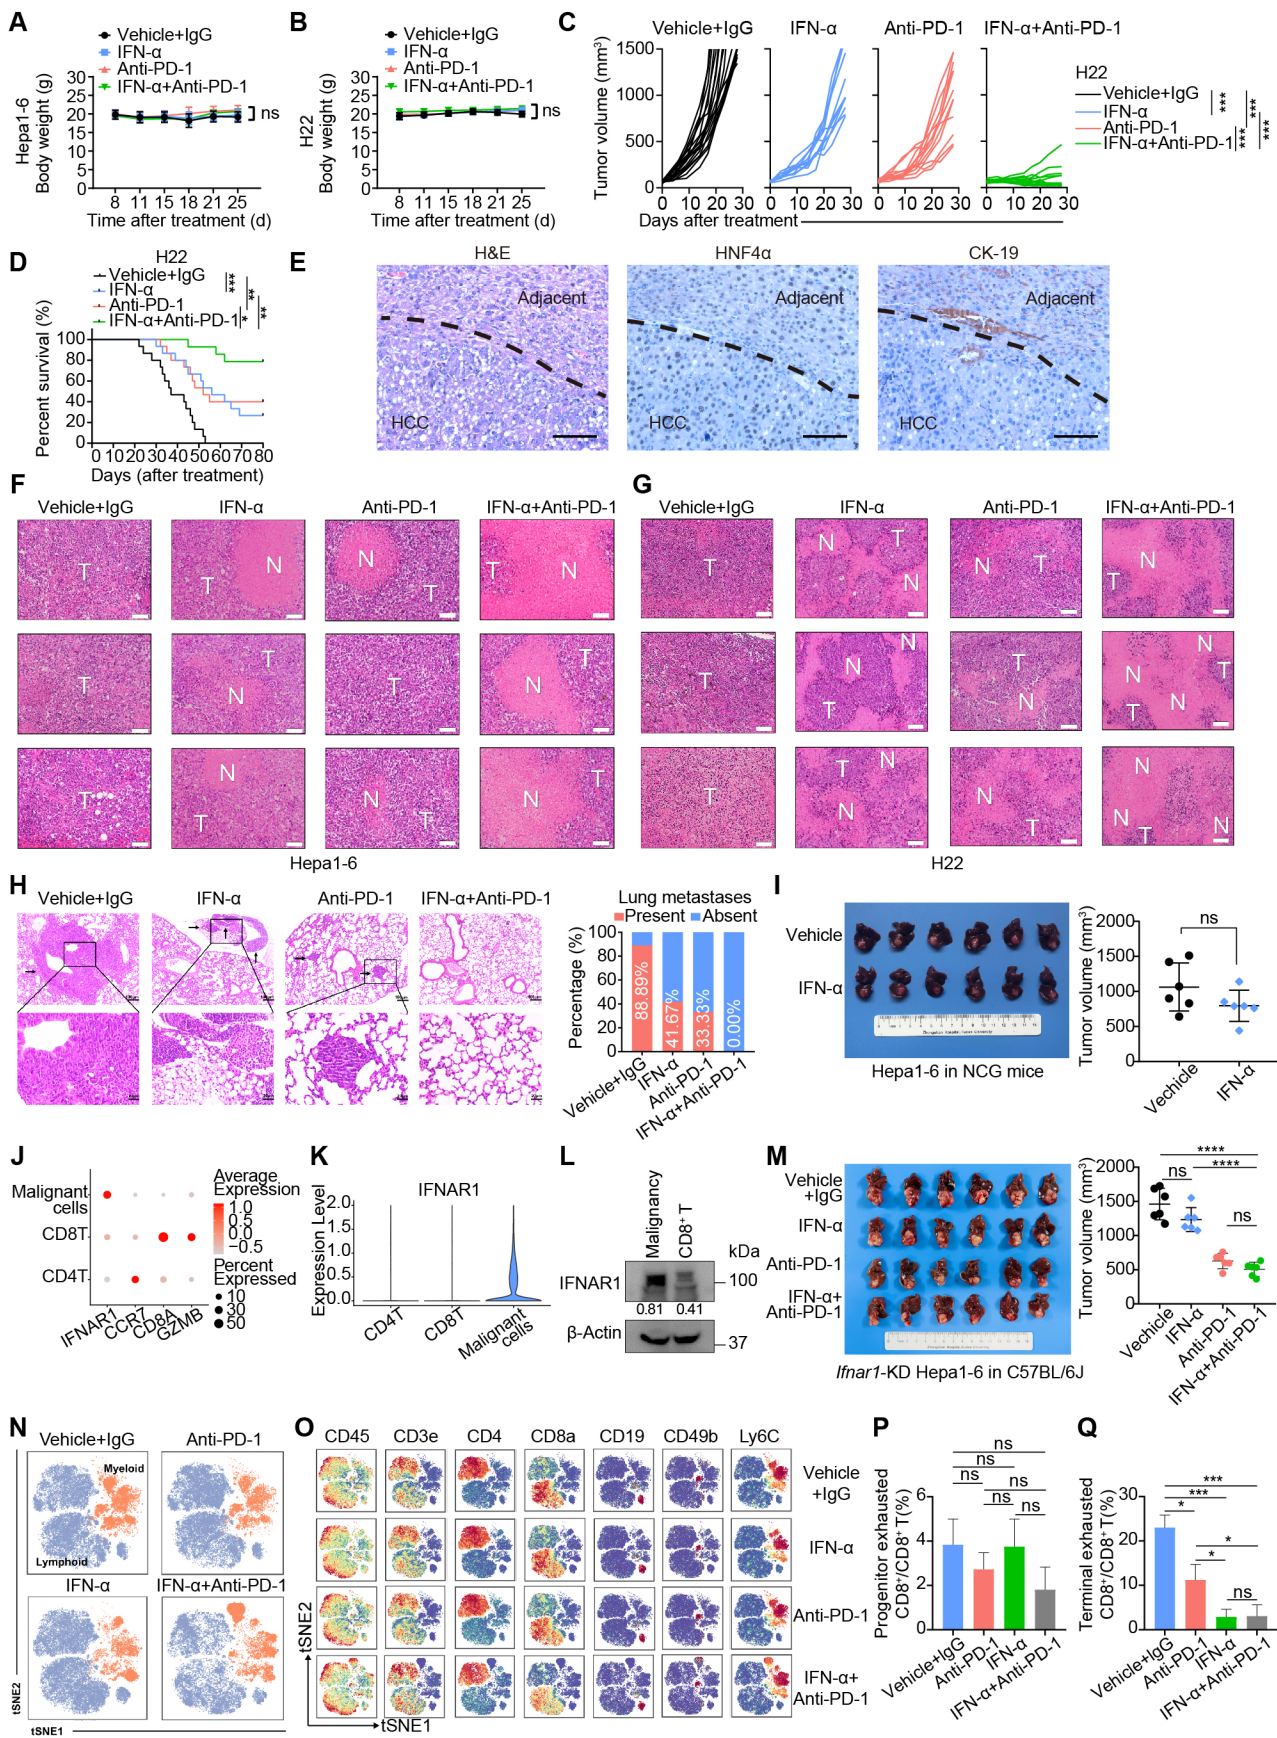

**Figure S2. IFN- $\alpha$  in combination with an anti-PD-1 antibody augmented antitumor immunity and altered the immune landscape of the TME.**

- (A-B)** Body weight of Hepa1-6 **(A)** and H22 **(B)** tumor-bearing mice treated with vehicle + 10 mg/kg IgG, 1 x 10<sup>4</sup> IU IFN- $\alpha$ , 10 mg/kg anti-PD-1, or the combination therapy.
- (C)** Growth curves of H22 tumors in BALB/c mice (vehicle + IgG, 10 mg/kg, n = 18; IFN- $\alpha$ , 1 x 10<sup>4</sup> IU, n = 12; anti-PD-1, 10 mg/kg, n = 12; combination therapy, n = 15).
- (D)** Survival curves of BALB/c mice bearing H22 tumors (n=15 per group) who received 10 mg/kg IgG, 1 x 10<sup>4</sup> IU IFN- $\alpha$ , 10 mg/kg anti-PD-1, or the combination therapy.
- (E)** HNF4 $\alpha$  and CK-19 immunohistochemistry on liver sections obtained from spontaneous HCC model. Nuclear staining indicated HNF-4 $\alpha$  positive cells in the middle panel. Scale bars: 100  $\mu$ m.
- (F-G)** Representative hematoxylin-eosin staining of Hepa1-6 **(F)** and H22 **(G)** tumor tissues in the indicated groups. T, tumor; N, necrotic region.
- (H)** Representative hematoxylin-eosin staining of lungs from mice bearing H22 tumors (vehicle + IgG, 10 mg/kg, n = 18; IFN- $\alpha$ , 1 x 10<sup>4</sup> IU, n = 12; anti-PD-1, 10 mg/kg, n = 12; combination therapy, n = 15) and the incidence of lung metastasis in the indicated groups.
- (I)** At the indicated end points, Hepa1-6 tumor-bearing NCG mice treated with vehicle or 1 x 10<sup>4</sup> IU IFN- $\alpha$  were sacrificed, and the livers from the mice are shown.
- (J)** Expression pattern of indicated genes among malignant cells, CD8<sup>+</sup> T, and CD4<sup>+</sup> T cells according to single-cell sequencing data of a previous report<sup>29</sup>.
- (K)** Expression levels of *IFNAR1* among malignant cells, CD8<sup>+</sup> T, and CD4<sup>+</sup> T cells according to published single-cell sequencing data.
- (L)** Immunoblotting assay results for IFNAR1 between malignant and CD8<sup>+</sup> T derived from orthotopic Hepa1-6 mice models.
- (M)** *Ifnar1* expression was silenced by using shRNA, and *Ifnar1*-knocked down Hepa1-6 cells were transplanted to generate orthotopic mice models, followed by indicated treatment. The livers bearing Hepa1-6 tumors after distinct treatment were shown (left). Quantifications of volume of *Ifnar1*-knocked down tumors after receiving indicated treatment (right).
- (N)** t-SNE plots of infiltrating lymphoid compartment (blue) and myeloid compartment (orange) by CyTOF analysis from Hepa1-6 tumors given the indicated treatment.
- (O)** t-SNE plots of infiltrating immune cells colored by the relative expression of the indicated markers in each group.
- (P)** Proportions of progenitor exhausted CD8<sup>+</sup> T cells in tumor tissues derived from murine models received indicated therapy were analyzed by flow cytometry assays.
- (Q)** Proportions of terminal exhausted CD8<sup>+</sup> T cells in tumor tissues derived from murine models received indicated therapy were analyzed by flow cytometry assays.

The results are shown as the mean  $\pm$  SD and the statistical significance of differences between groups was determined by an unpaired Student's *t* test.

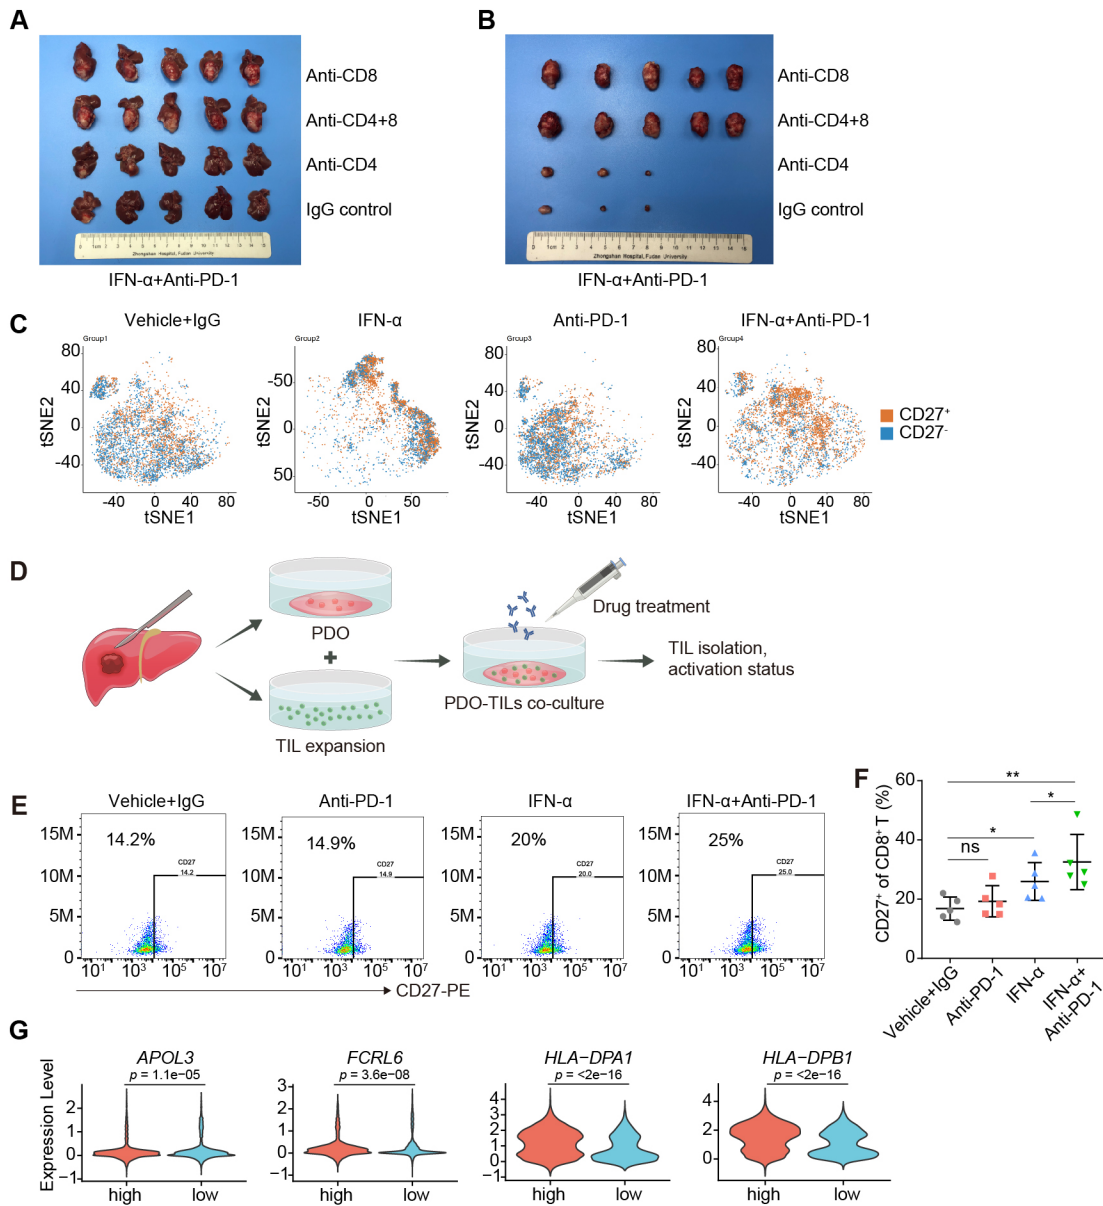

**Figure S3. IFN- $\alpha$  plus an anti-PD-1 antibody exerted antitumor effects in a CD8<sup>+</sup> T cell-dependent manner, and CD27<sup>+</sup> CD8<sup>+</sup> T cells correlated with immune activation.**

**(A-B)** At the indicated end points, mice treated with 10 mg/kg IgG, 10 mg/kg anti-CD4, 10 mg/kg anti-CD8, or both depleting antibodies were sacrificed. The livers bearing Hepa1-6 tumors **(A)** and the related Hepa1-6 tumors **(B)** are shown.

**(C)** t-SNE plots showing the relative expression of CD27 in CD8<sup>+</sup> T cells for each treatment condition.

**(D)** A graph abstract of HCC patient-derived organoid and autologous intratumoral immune cells co-culture model.

**(E-F)** Tumor cells and CD8<sup>+</sup> tumor infiltrating lymphocytes (TILs) were isolated from same HCC patient (n=5) and cultured respectively for 3 days. On day 3, HCC organoids and CD8<sup>+</sup>TILs were directly co-cultured in 5:1 ratio, supplemented with  $1 \times 10^4$  IU/ml IFN- $\alpha$  plus 100  $\mu$ g/ml anti-PD-1 antibody. After 72 hours of co-culture, the CD27<sup>+</sup>CD8<sup>+</sup> T cell population was evaluated by flow cytometry.

**(G)** Violin plot showing CD27 expression in the indicated clusters from HCC patients evaluated by single-cell sequencing.

The results are shown as the mean  $\pm$  SD for experiments performed in triplicate. Each experiment was repeated three times, and the statistical significance of differences between groups was determined by an unpaired Student's *t* test.



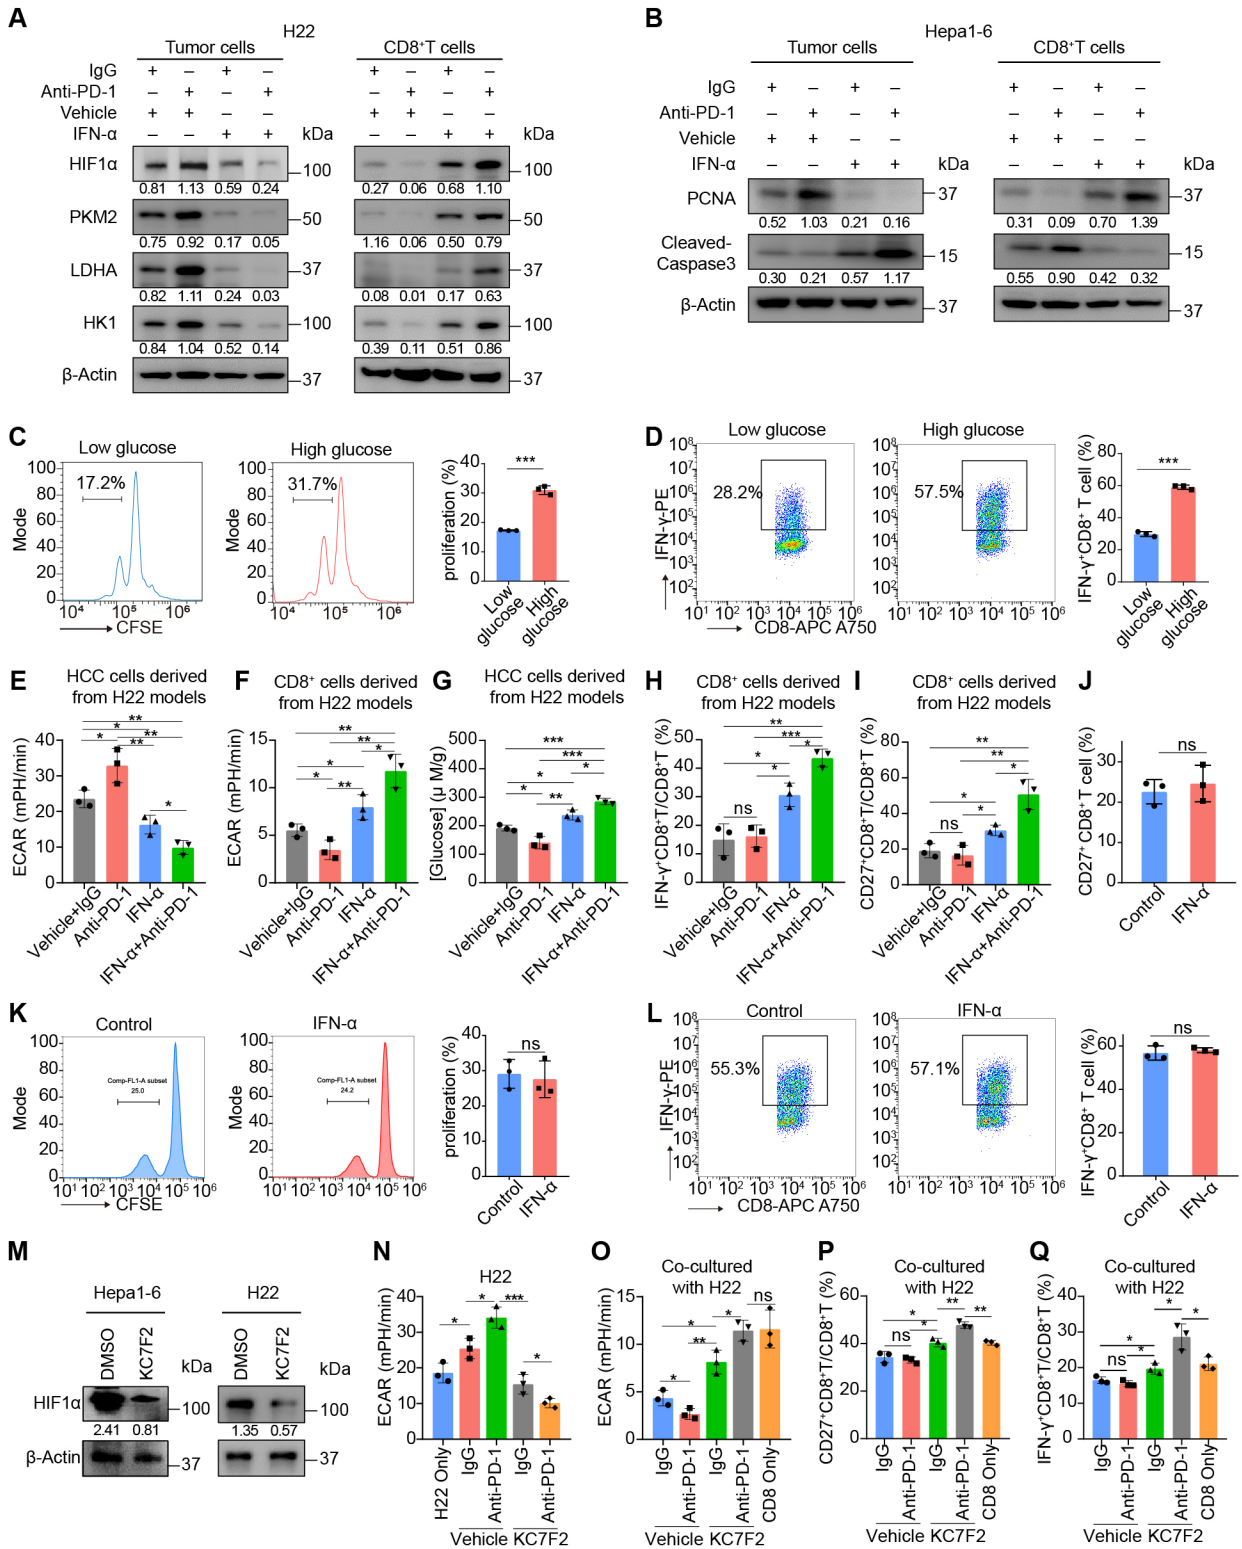

**Figure S4. IFN- $\alpha$  hindered glycolysis in tumors by inhibiting HIF1 $\alpha$  signaling to foster the activation of CD8<sup>+</sup> T cells.**

(A) Immunoblot assays for HIF1 $\alpha$ , PKM2, LDHA, and HK1 in H22 cells and CD8<sup>+</sup> T cells derived from distinct mouse models that received the indicated treatments. IFN- $\alpha$  concentration:  $1 \times 10^4$  IU; anti-PD-1 concentration: 10 mg/kg.  $\beta$ -Actin was used as an internal control.

**(B)** PCNA and cleaved Caspase-3 expression in HCC and CD8<sup>+</sup> T cells derived from Hepa1-6 mouse models that received the indicated treatments was determined by immunoblot assays. IFN- $\alpha$  concentration:  $1 \times 10^4$  IU; anti-PD-1 concentration: 10 mg/kg.  $\beta$ -Actin was used as an internal control.

**(C)** CFSE-labeled murine spleen CD8<sup>+</sup>T cells were cultured in the present of  $\alpha$ CD3 and  $\alpha$ CD28 in low-glucose (5 mM) or high-glucose (25 mM) RPMI medium, respectively, for three days. The fluorescence of CFSE was measured by flow cytometry. The proliferation rate of T cells was determined as the proportion of cells with reduced CFSE intensity due to cell division.

**(D)** Murine spleen CD8<sup>+</sup>T cells were cultured in the present of  $\alpha$ CD3 and  $\alpha$ CD28 in low-glucose (5 mM) or high-glucose (25 mM) RPMI medium, respectively, for three days. IFN- $\gamma$ <sup>+</sup>CD8<sup>+</sup>T cells were gated and calculated.

**(E)** ECAR results for tumor cells derived from distinct H22 mouse models that received IgG, 10 mg/kg anti-PD-1,  $1 \times 10^4$  IU IFN- $\alpha$  or combination treatment.

**(F)** ECAR results for CD8<sup>+</sup> T cells derived from different H22 mouse models that received IgG, 10 mg/kg anti-PD-1,  $1 \times 10^4$  IU IFN- $\alpha$  or combination treatment.

**(G)** Glucose concentration in the extracellular milieu of HCC tissues derived from different H22 mouse models that received IgG, 10 mg/kg anti-PD-1,  $1 \times 10^4$  IU IFN- $\alpha$  or combination treatment.

**(H)** IFN- $\gamma$ <sup>+</sup> CD8<sup>+</sup> T cells derived from different H22 mouse models that received IgG, 10 mg/kg anti-PD-1,  $1 \times 10^4$  IU IFN- $\alpha$  or combination treatment.

**(I)** CD27<sup>+</sup> CD8<sup>+</sup> T cells derived from different H22 mouse models that received IgG, 10 mg/kg anti-PD-1,  $1 \times 10^4$  IU IFN- $\alpha$  or combination treatment.

**(J)** Murine spleen CD8<sup>+</sup>T cells were activated in the present of  $\alpha$ CD3 and  $\alpha$ CD28 for three days and then treated with or without IFN- $\alpha$  for another 24 hours. CD27<sup>+</sup>CD8<sup>+</sup> T cells were measured by flow cytometry.

**(K)** CFSE-labeled murine spleen CD8<sup>+</sup>T cells were activated in the present of  $\alpha$ CD3 and  $\alpha$ CD28 for three days and then treated with or without IFN- $\alpha$  for another 24 hours. The fluorescence of CFSE was measured by FACS. The proliferation rate of T cells was determined as the proportion of cells with reduced CFSE intensity due to cell division.

**(L)** Murine spleen CD8<sup>+</sup>T cells were activated in the present of  $\alpha$ CD3 and  $\alpha$ CD28 for three days and then treated with or without IFN- $\alpha$  for another 24 hours. For IFN- $\gamma$  measurement, T cells were stimulated with PMA, ionomycin and golgi block for 4 hours and signals of IFN- $\gamma$  were determined by flow cytometry.

**(M)** The efficiency of HIF1 $\alpha$  inhibition (10  $\mu$ M KC7F2) in Hepa1-6 (left) and H22 (right) cells was validated by immunoblot assay.

**(N)** ECAR results for H22 cells that received IgG or 100  $\mu$ g/ml anti-PD1 treatment with or without 10  $\mu$ M KC7F2.

**(O)** ECAR results for CD8<sup>+</sup> T cells after coculture with H22 cells that received IgG or 100  $\mu$ g/ml anti-PD-1 treatment with or without 10  $\mu$ M KC7F2.

**(P)** CD27<sup>+</sup> proportion of CD8<sup>+</sup> T cells after coculture with tumor cells that received IgG or 100  $\mu$ g/ml anti-PD1 treatment with or without 10  $\mu$ M KC7F2.

**(Q)** IFN- $\gamma$ <sup>+</sup> proportion of CD8<sup>+</sup> T cells after coculture with tumor cells that received IgG or 100  $\mu$ g/ml anti-PD1 treatment with or without 10  $\mu$ M KC7F2.

The results are shown as the mean  $\pm$  SD for experiments performed in triplicate. Each experiment was repeated three times, and the statistical significance of differences between groups was determined by an unpaired Student's *t* test.

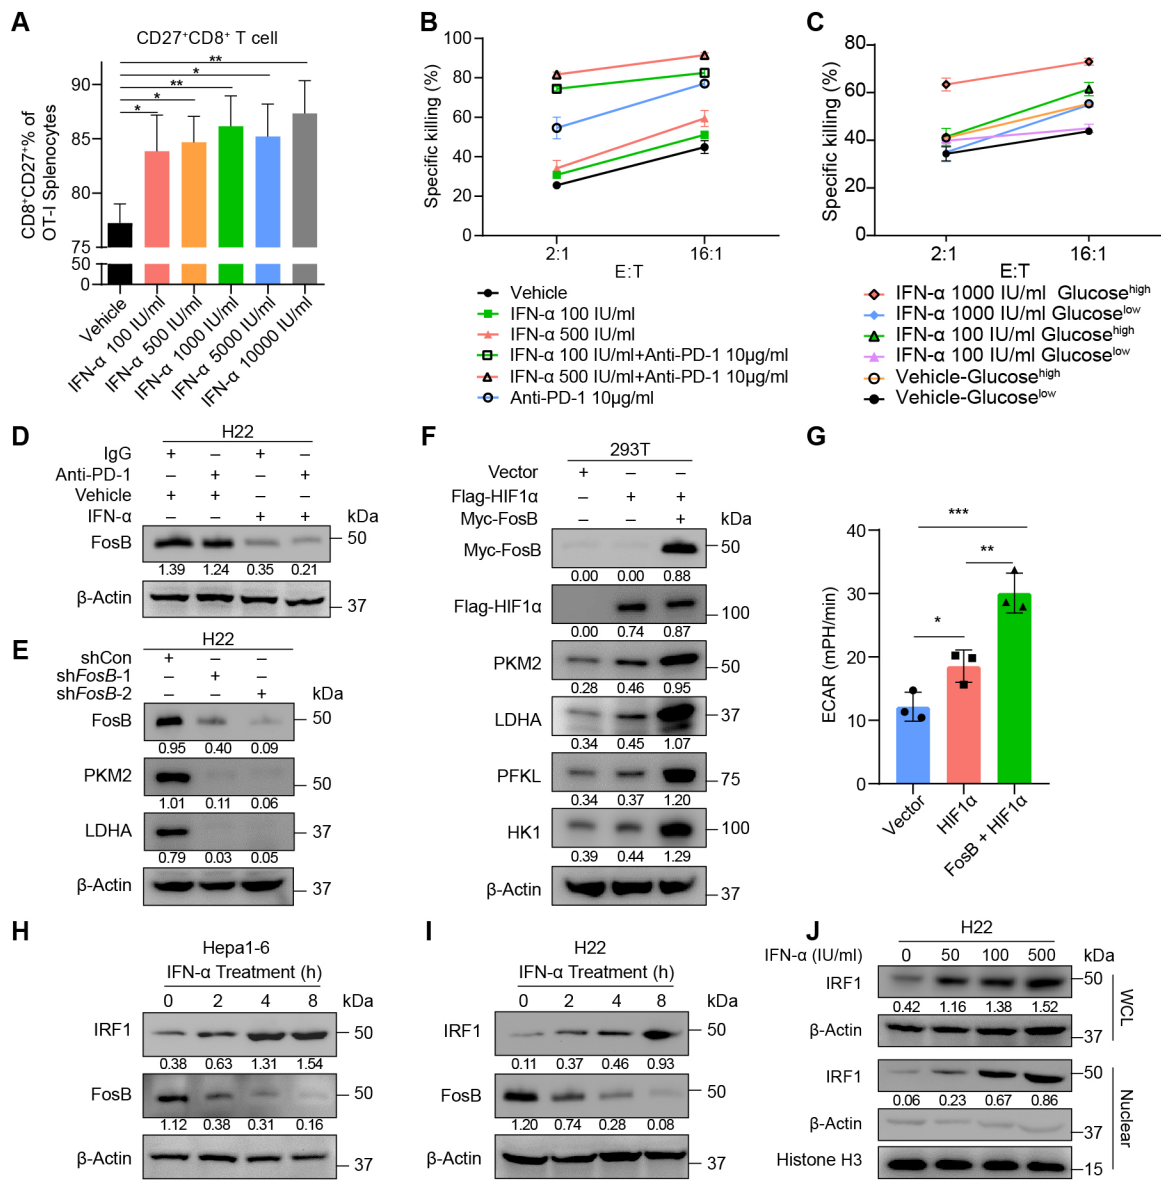

**Figure S5. IFN- $\alpha$  treatment restricted HIF1 $\alpha$  signaling by restraining the expression of FosB, a cotranscriptional effector of HIF1 $\alpha$ , in an IRF1-dependent manner.**

(A) After 48 h of IFN- $\alpha$  treatment, CD27 expression in OT-I CTLs which co-cultured with EL4 cells was detected by flow cytometry.

(B) OT-I mouse cytotoxic T cells were used to detect the activity of the combination of IFN- $\alpha$  and anti-PD-1 *in vitro*. OT-I CTLs were treated with anti-PD-1 antibody and different IFN- $\alpha$  concentrations. Different E:T ratios were used to evaluate activity.

(C) OT-I mouse cytotoxic T cells were used to detect the activity of the combination of IFN- $\alpha$  and distinct concentrations of glucose *in vitro*. OT-I CTLs were treated with low or high glucose and different IFN- $\alpha$  concentrations. Different E:T ratios were used to evaluate activity.

(D) The expression of FosB in tumor cells derived from H22 model mice that received the indicated treatments were detected by immunoblot assays. IFN- $\alpha$  concentration:  $1 \times 10^4$  IU; anti-PD-1 concentration: 10 mg/kg.  $\beta$ -Actin was used as an internal control.

(E) The impacts of FosB silencing on PKM2 and LDHA expression in H22 cells were evaluated by immunoblot assays.

(F) HIF1 $\alpha$  and FosB were cotransfected into 293T cells, and PKM2, LDHA, PFKL, and HK1 expression was determined by immunoblot assays.

(G) ECAR results for 293T cells transfected with the indicated plasmids.

**(H)** Impacts of IFN- $\alpha$  exposure duration on FosB expression in Hepa1-6 cells that received 500 IU IFN- $\alpha$ .

**(I)** Impacts of IFN- $\alpha$  exposure duration on FosB expression in H22 cells that received 500 IU IFN- $\alpha$ .

**(J)** The impacts of IFN- $\alpha$  on the expression of IRF1 in whole-cell lysates and nuclear fractions of H22 cells were evaluated by nuclear-cytoplasmic fractionation followed by immunoblot assays. IFN- $\alpha$ : 0 IU/ml, 50 IU/ml, 100 IU/ml, or 500 IU/ml.

The results are shown as the mean  $\pm$  SD for experiments performed in triplicate. Each experiment was repeated three times, and the statistical significance of differences between groups was determined by an unpaired Student's *t* test.



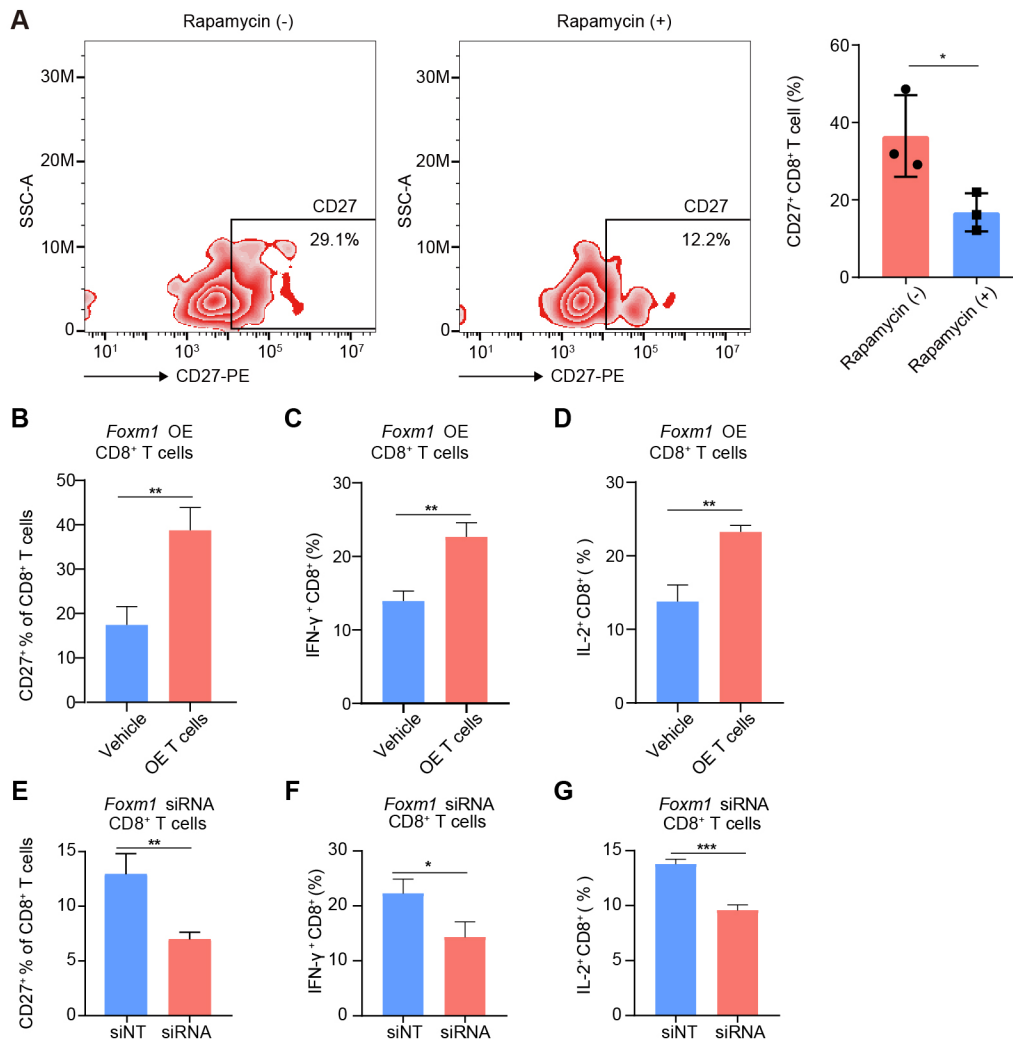

**Figure S6. A high-glucose microenvironment promotes CD8<sup>+</sup> T cell activation via mTOR-induced FOXM1 expression**

**(A)** Paired tumor cells and CD8<sup>+</sup> tumor infiltrating lymphocytes (TILs) were isolated from HCC patients (n=5) and cultured respectively for 3 days. TILs were pre-treated with or without 200 ng/ml rapamycin for 72 hours. On day 3, HCC organoids and CD8<sup>+</sup> TILs were directly co-cultured in 5:1 ratio, supplemented with  $1 \times 10^4$  IU/ml IFN- $\alpha$  plus 100  $\mu$ g/ml anti-PD-1 antibody. After 72 hours of co-culture, the CD27<sup>+</sup>CD8<sup>+</sup> T cell population was evaluated by flow cytometry. The data are presented as mean  $\pm$  SD. \* $p$  < 0.05.

**(B)** Murine spleen CD8<sup>+</sup> T cells were isolated and cultured in the presence of  $\alpha$ CD3 and  $\alpha$ CD28. On the next day, T cells were infected with *Foxm1*-overexpressing or vehicle control retrovirus for another 48 hours. Cells were collected and CD27 signal was measured by flow cytometry.

**(C-D)** For IFN- $\gamma$  and IL-2 measurement, T cells were stimulated with PMA, ionomycin and golgi block for 4 hours and signals of IFN- $\gamma$  **(C)** and IL-2 **(D)** were determined by flow cytometry, respectively.

**(E)** Murine spleen CD8<sup>+</sup> T cells were isolated and cultured in the presence of  $\alpha$ CD3 and  $\alpha$ CD28. On the next day, T cells were transfected with *Foxm1*-targeting siRNA or control siRNA. 48 hours later, T cells were collected and CD27 signal was measured by flow cytometry.

**(F-G)** For IFN- $\gamma$  and IL-2 measurement, T cells were stimulated with PMA, ionomycin and golgi block for 4 hours and signals of IFN- $\gamma$  **(F)** and IL-2 **(G)** were determined by flow cytometry, respectively.

All data are representative of three independent experiments and presented as mean  $\pm$  SD. \* $p$  < 0.05, \*\* $p$  < 0.01, \*\*\* $p$  < 0.001.

**Supplementary table 1. Characteristics of the Patients at Baseline.**

| Characteristics                                                                                                                                                     | Patients(N=15) | %  |
|---------------------------------------------------------------------------------------------------------------------------------------------------------------------|----------------|----|
| Age at enrollment(years)                                                                                                                                            |                |    |
| Median(range)                                                                                                                                                       | 56 (31-69)     |    |
| <60 years                                                                                                                                                           | 10             | 67 |
| ≥60 years                                                                                                                                                           | 5              | 33 |
| Sex                                                                                                                                                                 |                |    |
| Female                                                                                                                                                              | 3              | 20 |
| Male                                                                                                                                                                | 12             | 80 |
| Aetiology                                                                                                                                                           |                |    |
| HBV                                                                                                                                                                 | 13             | 87 |
| HCV                                                                                                                                                                 | 1              | 7  |
| NASH                                                                                                                                                                | 0              | 0  |
| Other                                                                                                                                                               | 1              | 7  |
| Tumor size (cm)                                                                                                                                                     |                |    |
| ≤5                                                                                                                                                                  | 3              | 20 |
| >5                                                                                                                                                                  | 12             | 80 |
| Tumor number                                                                                                                                                        |                |    |
| Single                                                                                                                                                              | 4              | 27 |
| multiple                                                                                                                                                            | 11             | 73 |
| AFP                                                                                                                                                                 |                |    |
| Elevated                                                                                                                                                            | 10             | 67 |
| TB                                                                                                                                                                  |                |    |
| Elevated                                                                                                                                                            | 3              | 20 |
| ALT                                                                                                                                                                 |                |    |
| Elevated                                                                                                                                                            | 4              | 27 |
| BCLC stage                                                                                                                                                          |                |    |
| A+B                                                                                                                                                                 | 8              | 53 |
| C+D                                                                                                                                                                 | 7              | 47 |
| CNLC stage <sup>1</sup>                                                                                                                                             |                |    |
| I+II                                                                                                                                                                | 8              | 53 |
| III+IV                                                                                                                                                              | 7              | 47 |
| <b>Abbreviations:</b> AFP, alpha-fetoprotein; ALT, alanine aminotransferase; CNLC stage, China Liver Cancer stage; BCLC stage, Barcelona Clinic Liver Cancer stage. |                |    |

**Reference**

1. Zhou J, Sun H, Wang Z, et al. Guidelines for the Diagnosis and Treatment of Hepatocellular Carcinoma (2019 Edition). *Liver Cancer*. 2020;9:682-720.

**Supplementary table 2. Antibodies used for CyTOF staining**

| Isotypes | Antibodies    | Clone     | Source         | Identifier |
|----------|---------------|-----------|----------------|------------|
| 89Y      | CD45          | 30-F11    | BioLegend      | 103102     |
| 115In    | CD3e          | 145.2C11  | BioLegend      | 100302     |
| 139La    | CD44          | IM7       | BioLegend      | 103002     |
| 141Pr    | CD24          | M1/69     | BioLegend      | 101802     |
| 142Nd    | MHC II        | Y3P       | Bio-Xcell      | BE0178     |
| 143Nd    | CD45R(B220)   | RA3-6B2   | BioLegend      | 103202     |
| 144Nd    | CX3CR1        | SA011F11  | BioLegend      | 149002     |
| 145Nd    | CD21/CD35     | 7G6       | BD Biosciences | 559831     |
| 146Nd    | IgM           | RMM-1     | BioLegend      | 406502     |
| 147Sm    | CD80          | 16-10A1   | BioLegend      | 104702     |
| 148Nd    | Ly-6C         | HK1.4     | BioLegend      | 128002     |
| 149Nd    | CD172a(SIRPα) | P84       | BioLegend      | 144002     |
| 150Nd    | IgD           | 11-26c.2a | BioLegend      | 405702     |
| 151Eu    | CD62L         | MEL14     | BioLegend      | 104402     |
| 152Sm    | CD11c         | N418      | BioLegend      | 117302     |
| 153Eu    | TCRgd         | GL3       | in-house       | NA         |
| 154Sm    | Ki-67         | SolA15    | eBioscience    | 14-5698-82 |
| 155Gd    | CD38          | 90        | BioLegend      | 102702     |
| 156Gd    | CD317(BST2)   | 44E9R     | R&D systems    | MAB8660    |
| 157Gd    | CD27          | LG.3A10   | BioLegend      | 124202     |
| 158Gd    | CD19          | 6D5       | BioLegend      | 115502     |
| 159Tb    | F4/80         | C1:A3-1   | Bio-RAD        | MCA497G    |
| 160Gd    | CD115(CSF-1R) | AFS98     | BioLegend      | 135502     |
| 161Dy    | iNOS          | CXNFT     | eBioscience    | 14-5920-82 |
| 162Dy    | CD183(CXCR3)  | CXCR3-173 | BioLegend      | 126502     |
| 163Dy    | CD25          | 3C7       | BioLegend      | 101902     |
| 164Dy    | CD103         | 2E7       | BioLegend      | 121402     |
| 165Ho    | CD278(ICOS)   | C398.4A   | BioLegend      | 313502     |
| 166Er    | Arginase I    | polyclone | Fluidigm       | 3166023B   |
| 167Er    | CD49b         | DX5       | BioLegend      | 108902     |
| 168Er    | Foxp3         | FJK-16s   | eBioscience    | 14-5773-82 |
| 169Tm    | CD69          | H1.2F3    | BioLegend      | 104502     |
| 170Er    | CD49a         | HMa1      | BioLegend      | 142602     |
| 171Yb    | CD23          | B3B4      | BioLegend      | 101602     |
| 172Yb    | CD127         | A7R34     | BioLegend      | 135002     |
| 173Yb    | Granzyme B    | GB11      | Fluidigm       | 3173006B   |
| 174Yb    | CD152(CTLA-4) | UC10-4B9  | BioLegend      | 106302     |
| 175Lu    | TCRab         | H57-597   | BioLegend      | 109202     |
| 176Yb    | CD43          | S11       | BioLegend      | 143202     |
| 197Au    | CD4           | RM4-5     | BioLegend      | 100520     |
| 198Pt    | CD8a          | 53-6.7    | BioLegend      | 100716     |
| 209Bi    | CD11b         | M1/70     | in-house       | NA         |
